# Supplementary material for: A Sustainable Strategy for Solid-Phase Extraction of Antiviral Drug from Environmental Waters by Immobilized Hydrogen Bond Acceptor
Source: MDPI journal article supplement (doi:10.3390/nano12081287), 2022-04-10
Supplement: s1 [file s1]

**A Sustainable Strategy for Solid-phase Extraction of Antiviral Drug from  
Environmental Waters by Immobilized Hydrogen Bond Acceptor**

Hongrui Yang, Chen Wang, Wenjuan Zhu, Xia Zhang, Tiemei Li, Jing Fan\*

School of Environment, Key Laboratory of Yellow River and Huai River Water  
Environment and Pollution Control, Ministry of Education, Henan Key Laboratory for  
Environmental Pollution Control, Henan Normal University, Xinxiang, Henan  
453007, PR China

**Table of contents**

1. The **preparation** of deep eutectic solvent of choline chloride and arbidol
2. **The Equation S1. The ion/molecule fraction distribution formula**
3. **Table S1.** The EDS element content of PS-CH<sub>2</sub>Cl (a) and the immobilized-HBA (b)
4. **Table S2.** The melting point of choline chloride, arbidol and choline chloride-arbidol
5. **Table S3. The ionization degree of arbidol at different pH values**
6. **Table S4.** Kinetic parameters for the adsorption of arbidol by the immobilized-HBA at 20°C and pH=5.5
7. **Figure S1.** The Energy dispersive X-ray energy spectrum of PS-CH<sub>2</sub>Cl
8. **Figure S2.** The Energy dispersive X-ray energy spectrum of the immobilized-HBA
9. **Figure S3.** FT-IR spectra of PS-CH<sub>2</sub>Cl (a) and the immobilized-HBA (b)
10. **Figure S4.** TGA curves of PS-CH<sub>2</sub>Cl (a) and the immobilized-HBA (b)
11. **Figure S5.** Mid-IR spectra (a) and Far-IR spectra (b) of choline chloride (1), choline chloride-arbidol (2), and arbidol (3)
12. **Figure S6.** Influence of temperature on the extraction efficiency of arbidol. Conditions: C<sub>arbidol</sub> = 25 mg/L, t = 30 min, pH=5.5
13. **Figure S7.** Adsorption isotherms of arbidol onto the immobilized-HBA fitted by Freundlich model and the Langmuir model / Conditions: t = 30 min, T = 20 °C, m<sub>immobilized-HBA</sub>=10 mg, V<sub>arbidol</sub>=5ml, pH=5.5.

- 14. Figure S8.** The pseudo-first-order model and pseudo-second-order model for the adsorption of arbidol by the immobilized-HBA / Conditions:  $C_{\text{arbidol}} = 300 \text{ mg/L}$ ,  $T = 20^{\circ}\text{C}$ ,  $\text{pH}=5.5$ .
- 15. Figure S9.** UV-visible absorption spectra of arbidol (a) and the recovered arbidol (b)
- 16. Figure S10.** FT-IR spectra of the fresh (a) and the regenerated (b) immobilized-HBA.
- 17. Figure S11.** The structure of arbidol

### The preparation of deep eutectic solvent of choline chloride and arbidol

One kind of deep eutectic solvents was prepared by using choline chloride as hydrogen bond acceptor (HBA) and arbidol as hydrogen bond donor (HBD). The DES was prepared by simply mixing choline chloride (HBA) and arbidol (HBD) under stirring at room temperature, and then reacted at 120 °C for 30 min until a uniform and stable liquid was formed. The molar ratio of choline chloride to arbidol was 1:1.

### The Equation (S1)

The ion/molecule fraction distribution was calculated by

$$\phi_{ions} = \frac{1}{[1 + 10^{(pKa - pH)}]} \quad (S1)$$

where  $\phi_{ions}$  stands for ion fraction, the pKa of arbidol is 6.5.

**Table. S1.** The EDS element content of PS-CH<sub>2</sub>Cl and the immobilized-HBA

| Material type         | Element | Content (%) |
|-----------------------|---------|-------------|
| PS-CH <sub>2</sub> Cl | C       | 72.77       |
|                       | Cl      | 27.23       |
| immobilized-HBA       | C       | 58.24       |
|                       | Cl      | 14.78       |
|                       | N       | 8.83        |
|                       | O       | 18.15       |

**Table. S2.** The melting point of choline chloride, arbidol and choline chloride-arbidol

| Chemical                      | Melting point /°C |
|-------------------------------|-------------------|
| choline chloride              | 305.1             |
| arbidol                       | 134.8             |
| Choline chloride-arbidol(1:1) | 88.4              |

**Table S3.** The ionization degree of arbidol at different pH values

| pH  | $\varphi_{\text{ions}}$ | pH  | $\varphi_{\text{ions}}$ |
|-----|-------------------------|-----|-------------------------|
| 3   | $3.162 \times 10^{-4}$  | 6.5 | 0.50                    |
| 4   | $3.152 \times 10^{-3}$  | 7   | 0.759                   |
| 5   | $3.065 \times 10^{-2}$  | 8   | 0.969                   |
| 5.5 | $9.090 \times 10^{-2}$  | 9   | 0.997                   |
| 6.0 | 0.240                   |     |                         |

**Table S4.** Kinetic parameters for the adsorption of arbidol by the immobilized-HBA at 20 °C and  
pH=5.5

| pseudo-first-order model |                    |       | pseudo-second-order model                    |                    |       |
|--------------------------|--------------------|-------|----------------------------------------------|--------------------|-------|
| $K_1(\text{min}^{-1})$   | $q_e(\text{mg/g})$ | $R^2$ | $K_2(\text{g}/(\text{mg} \cdot \text{min}))$ | $q_e(\text{mg/g})$ | $R^2$ |
| 0.029                    | 9.77               | 0.635 | $8.57 \times 10^{-4}$                        | 145.8              | 0.994 |

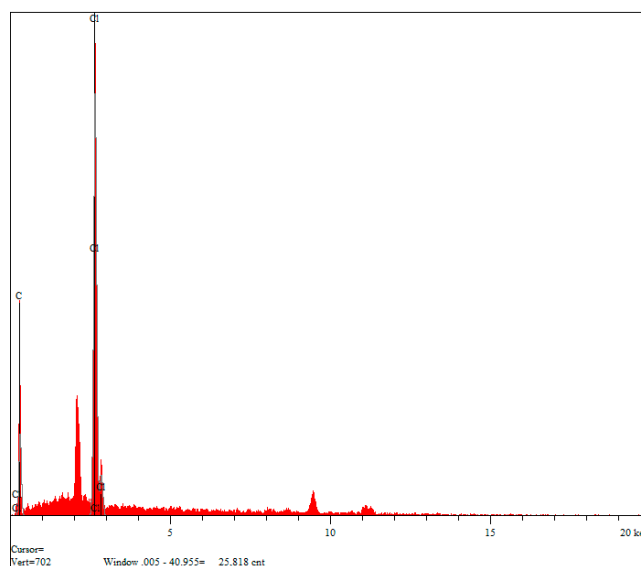**Figure S1.** Energy dispersive X-ray energy spectrum of PS-CH<sub>2</sub>Cl.

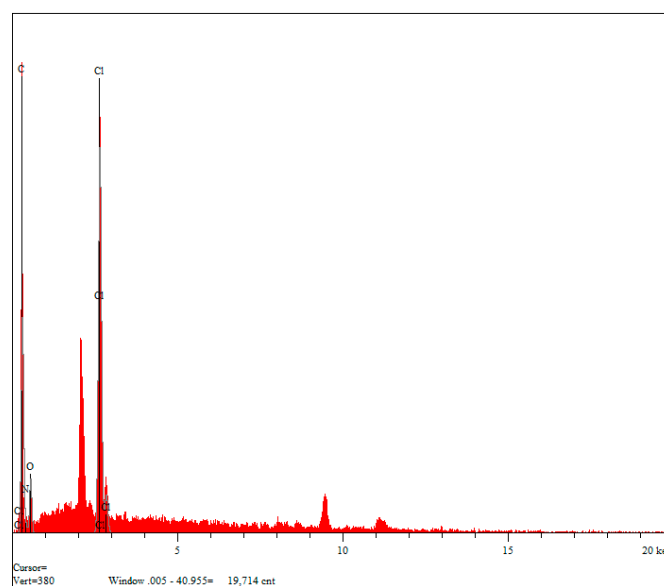

**Figure S2.** Energy dispersive X-ray energy spectrum of the immobilized-HBA.

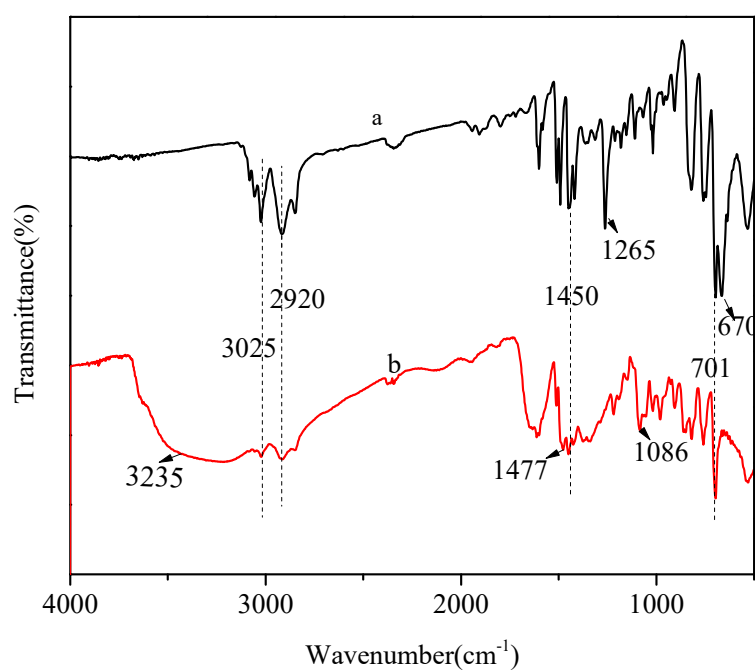

**Figure S3.** FT-IR spectra of PS-CH<sub>2</sub>Cl (a) and the immobilized-HBA (b).

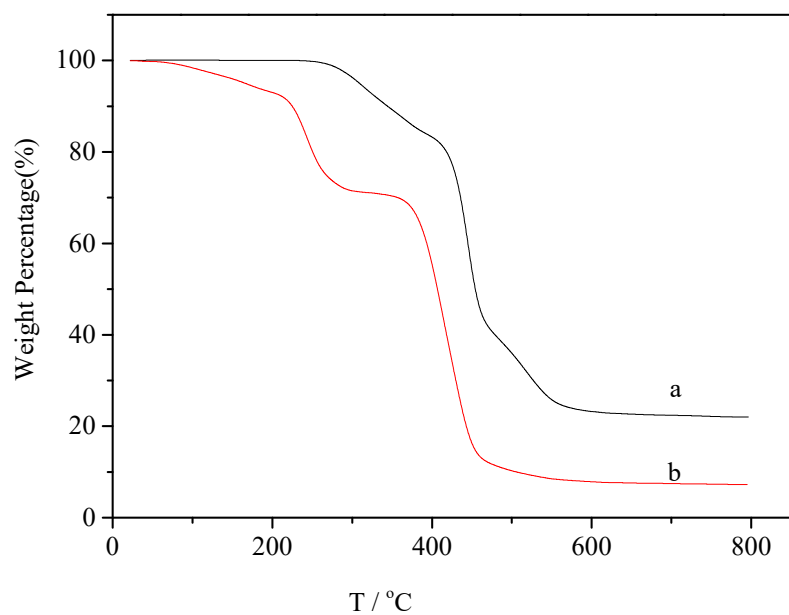

**Figure S4.** Thermal gravimetric analysis curves of PS-CH<sub>2</sub>Cl (a) and the immobilized-HBA (b).

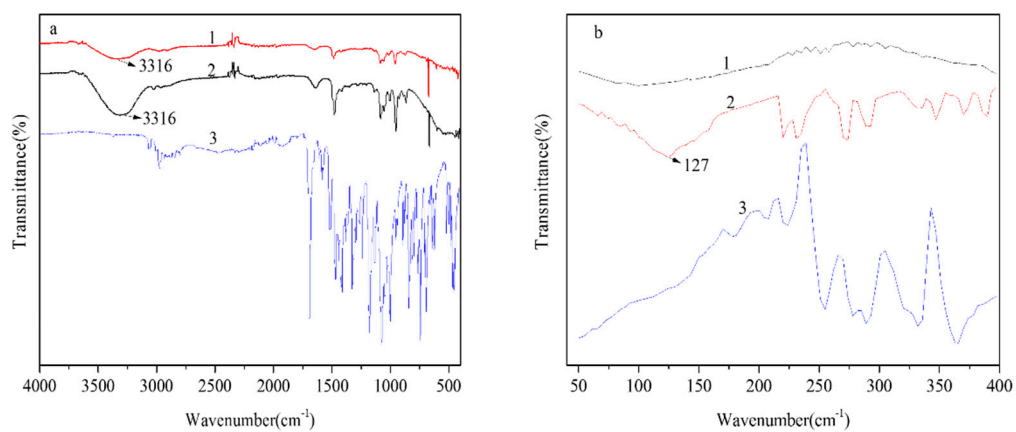

**Figure S5.** Mid-IR spectra (a) and Far-IR spectra (b) of choline chloride (1), choline chloride-arbidol (2), and arbidol (3).

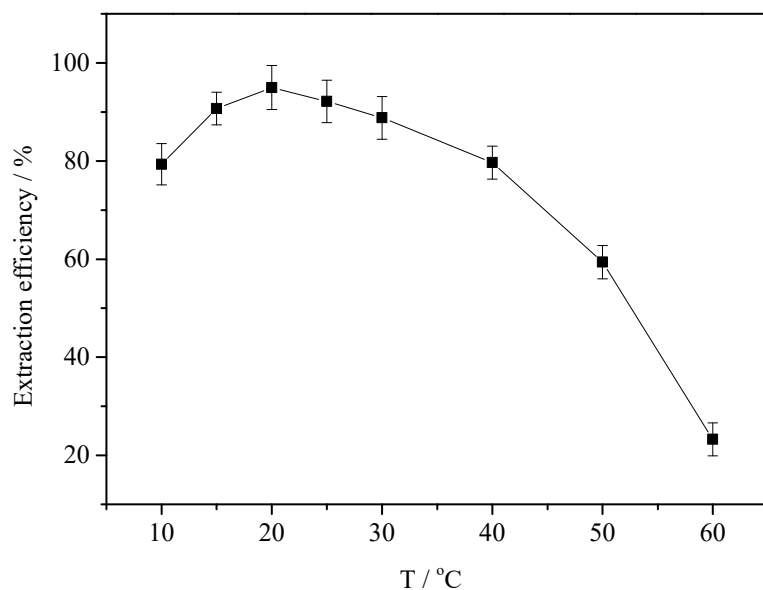

**Figure S6.** Influence of temperature on the extraction efficiency of arbidol. Conditions:  $C_{\text{arbidol}} = 25 \text{ mg/L}$ ,  $t = 30 \text{ min}$ .

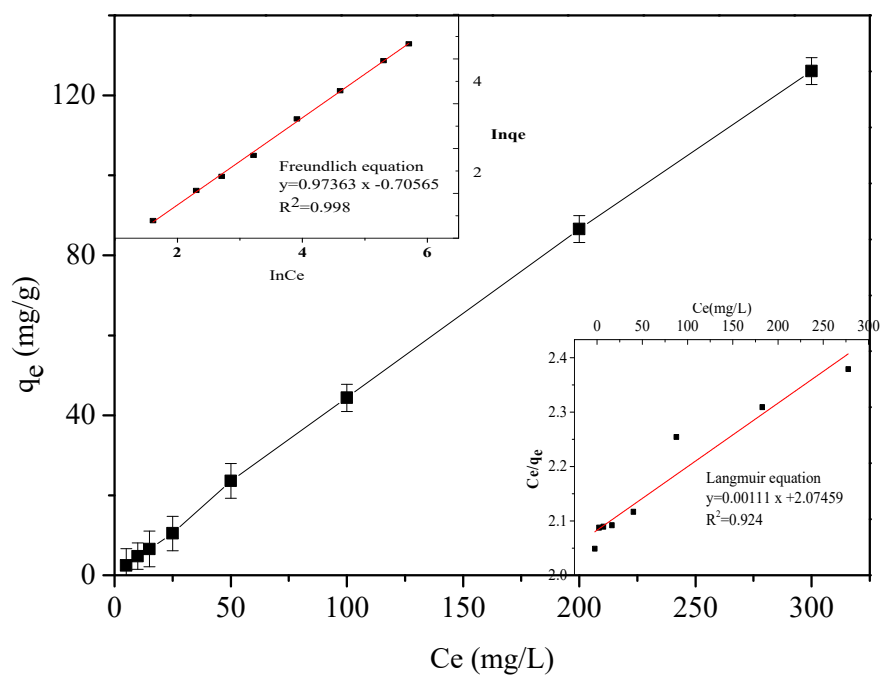

**Figure S7.** Adsorption isotherms of arbidol onto the immobilized-HBA fitted by Freundlich model and the Langmuir model / Conditions:  $t = 30 \text{ min}$ ,  $T = 20 \text{ }^{\circ}\text{C}$ ,  $m_{\text{immobilized-HBA}} = 10 \text{ mg}$ ,  $V_{\text{arbidol}} = 5 \text{ ml}$ ,  $\text{pH} = 5.5$ .

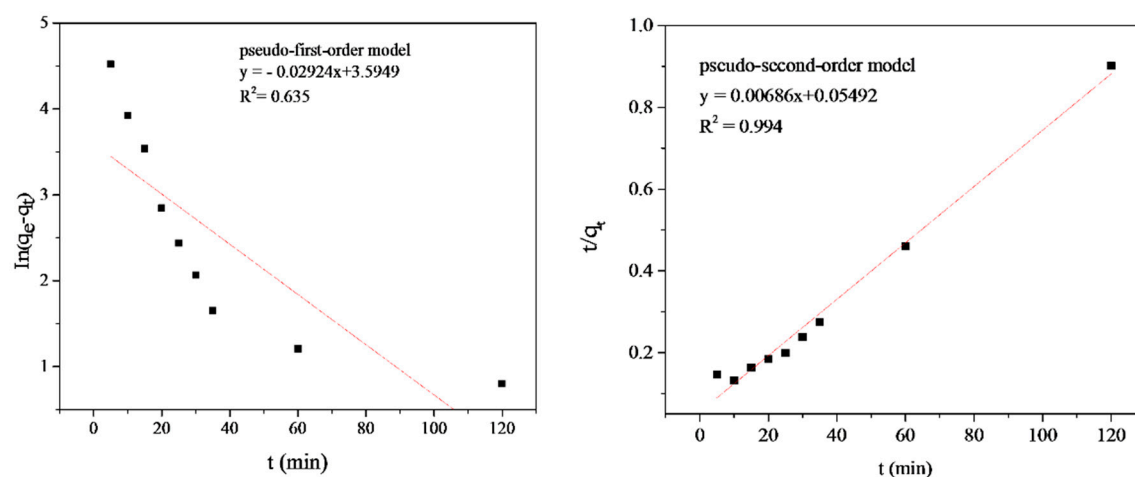

**Figure S8.** The pseudo-first-order model and pseudo-second-order model for the adsorption of arbidol by the immobilized-HBA / Conditions:  $C_{\text{arbidol}} = 300 \text{ mg/L}$ ,  $T = 20^\circ\text{C}$ ,  $\text{pH} = 5.5$ .

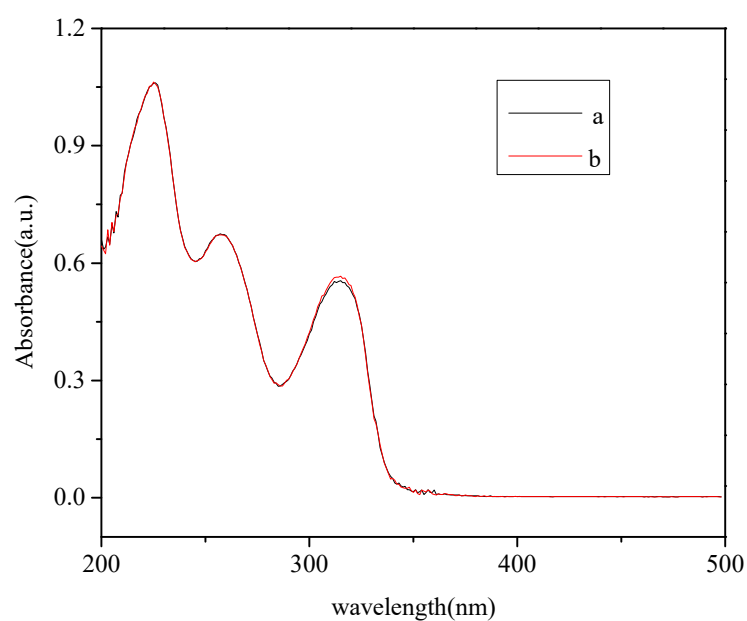

**Figure S9.** UV-visible absorption spectra of arbidol (a) and the recovered arbidol (b).



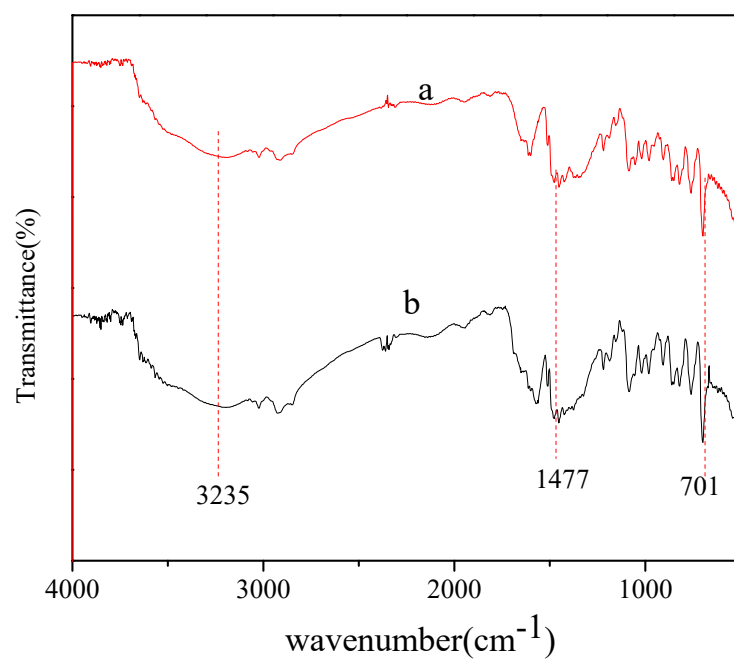

**Figure S10.** FT-IR spectra of the fresh (a) and the regenerated (b) immobilized-HBA.

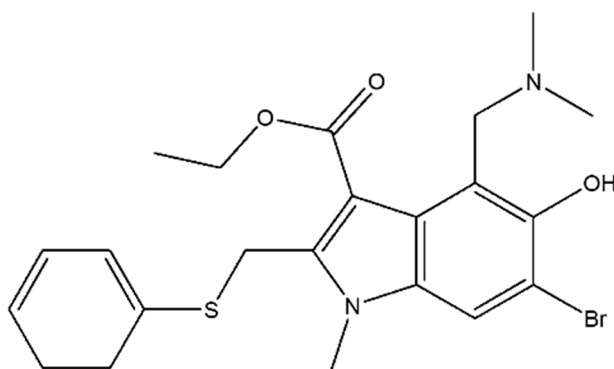

**Figure S11.** The chemical structure of arbidol.
